# Supplementary material for: A GRIA2 and PAX8-positive renal solitary fibrous tumor with NAB2-STAT6 gene fusion
Source: PubMed Central journal article supplement (PMC4559176; doi:10.1186/s13000-015-0386-x), 2015-09-04
Supplement: 13000_2015_386_MOESM1_ESM.pdf [file 13000_2015_386_MOESM1_ESM.pdf]

## **Additional File1**

### **Methods**

#### ***Immunohistochemical staining***

Immunohistochemistry (IHC) for desmin, S-100, CK-AE1/AE3, CD34, CD99, Bcl2, vimentin,  $\alpha$ -smooth muscle actin ( $\alpha$ -SMA), Ki-67 (all from DAKO Japan, Tokyo, Japan), STAT6 (sc-621; Santa Cruz Biotechnology, Santa Cruz, CA, 1:1000 dilution), NAB2 (sc-23867, Santa Cruz Biotechnology, 1:100 dilution), GRIA2 (ab52896; Abcam, Tokyo, Japan, 1:100 dilution) and PAX8 (10336-1-AP; ProteinTech Group, Chicago, IL, 1:50 dilution) were carried out with a standard procedure, as described elsewhere [25, 32, 36, 37]. Briefly, tissue sections (3 $\mu$ m) were deparaffinized in xylene, rehydrated. Endogenous peroxidase was blocked with 3% H<sub>2</sub>O<sub>2</sub> in methanol for 15min. Sections were incubated with primary antibodies overnight after heat-induced antigen retrieval with a pressure cooker (120°C, 10min). Detection was performed by the peroxidase method using 3,3'-diaminobenzidine in the presence of H<sub>2</sub>O<sub>2</sub>. The sections were counterstained with haematoxylin for nuclear detection, dehydrated, and mounted as permanent histological specimens. Appropriate positive and negative controls were used for IHC in

the present study.

### ***Identification of a NAB2–STAT6 gene fusion in the SFT sample***

Reverse transcription-polymerase chain reaction (RT-PCR) and direct sequencing were used to evaluate the *NAB2-STAT6* gene fusion. Briefly, total RNA was extracted from fresh frozen samples using a mirVana miRNA Isolation Kit (Life Technologies Japan, Tokyo, Japan). The first-strand complementary DNA was synthesized from the RNA extracts with a High-Capacity cDNA Reverse Transcription Kit (Life Technologies Japan, Tokyo, Japan).

The *NAB2–STAT6* gene fusion was examined via RT-PCR with specifically designed sets of PCR primers, with reference to previous papers [20, 21, 23]. Direct sequence analysis of the PCR products was performed using the Big-Dye terminator method (version 1.1; Applied Biosystems, Foster City, CA) to confirm the breakpoints of fusion transcripts [20, 21, 23] [32]. Primers for RT-PCR and direct DNA sequencing are shown in Table 1.

### ***In situ proximity ligation brightfield assay***

An *in situ* proximity ligation brightfield assay for IHC of nuclear *NAB2-STAT6* fusion in SFT was performed using primary antibodies against NAB2 (monoclonal mouse, clone 1C4: sc-23867, Santa Cruz Biotechnology, Santa Cruz, CA, 1:50 dilution) and SATA6 (polyclonal rabbit, clone S-20: sc-621; Santa Cruz Biotechnology, 1:50 dilution), according to previous studies [5, 33] and the manufacturer's instruction (Duolink® In Situ Detection Reagents Brightfield, Duo92012; Sigma-Aldorich Japan, Tokyo, Japan). Briefly, 3µm sections of paraffin blocks were pretreated in citrate buffer (pH 6) in an autoclave at 100°C for 20 min. Intrinsic peroxidase quenching and blocking was performed with the vender's reagent (Duo92012). Slides were incubated with primary anti-NAB2 and anti-STAT6 antibodies at 4°C overnight. Subsequent protocols, such as incubation with secondary antibodies, ligation, amplification, detection reaction, and nuclear counterstaining, were performed using the Duolink® kit according to the manufacturer's instructions [5, 33].
