# Supplementary material for: A GRIA2 and PAX8-positive renal solitary fibrous tumor with NAB2-STAT6 gene fusion
Source: PubMed Central journal article supplement (PMC4559176; doi:10.1186/s13000-015-0386-x), 2015-09-04
Supplement: 13000_2015_386_MOESM2_ESM.pdf [file 13000_2015_386_MOESM2_ESM.pdf]

**Table 1. Primers used for reverse transcription-polymerase chain reaction and direct DNA sequencing**

| <b>Primers for RT-PCR</b> | <b>Name</b> | <b>Sequence</b>       |
|---------------------------|-------------|-----------------------|
| Forward (5'-3')           | F_NAB2ex1A  | aggctcggagagagaagacg  |
|                           | F_NAB2ex1C  | ggacagagcctggacagc    |
| Reverse (5'-3')           | R_STAT6ex5  | gaaagtggcaccagcttca   |
|                           | R_STAT6ex8  | ctctagctctccagtgg     |
|                           | R_STAT6ex11 | cagtcccaggaatgctgtt   |
|                           | R_STAT6ex15 | caaaccactgccaaaagggtg |
|                           | R_STAT6ex18 | gatgtagctgggacataacc  |
|                           | R_STAT6ex23 | agtgaggtcctgttcagtgg  |

  

| <b>Primer for direct DNA sequencing</b> | <b>Name</b> | <b>Sequence</b>       |
|-----------------------------------------|-------------|-----------------------|
| Forward (5'-3')                         | F_NAB2ex2B  | tctggagatcatggcacttgt |
|                                         | F_NAB2ex2C  | atccagggtcttcagtcaa   |
| Reverse (5'-3')                         | R_STAT6ex3  | aagatgccccagaaaaagt   |
|                                         | R_STAT6ex5  | gaaagtggcaccagcttca   |

RT-PCR: reverse transcription-polymerase chain reaction
